# Supplementary material for: Co-reductive fabrication of carbon nanodots with high quantum yield for bioimaging of bacteria
Source: publisher site journal article supplement (doi:10.3762/bjnano.9.16), 2018-01-12
Supplement: Additional file 1 [file 2190-4286-9-16-S1.pdf]

# Supporting Information

for

## **Co-reductive fabrication of carbon nanodots with high quantum yield for bioimaging of bacteria**

Jiajun Wang<sup>1</sup>, Xia Liu<sup>1</sup>, Gesmi Milcovich<sup>2</sup>, Tzu-Yu Chen<sup>3</sup>, Edel Durack<sup>2</sup>, Sarah Mallen<sup>2</sup>, Yongming Ruan<sup>1</sup>, Xuexiang Weng\*<sup>1</sup> and Sarah P. Hudson\*<sup>2</sup>

Address: <sup>1</sup>College of Chemistry and Life Science, Zhejiang Normal University, Jinhua 321004, PR China, <sup>2</sup>Department of Chemical Sciences, Bernal Institute, University of Limerick, Castletroy, Ireland and <sup>3</sup>School of Chemistry, University of Birmingham, Edgbaston, Birmingham B15 2TT, UK

Email: Xuexiang Weng - xuexian@zjnu.cn; Sarah P. Hudson -

sarah.hudson@ul.ie

\* Corresponding author

### **Additional experimental data**

## Content

1. The generality of co-reduction method with urea and thiourea to obtain C-dots (Table S1).
2. The scale-up synthesis of C-dots (Table S2).
3. TEM and size distribution of  $S_{b50}$  (Figure S1).
4. XRD patterns of  $S_a$ ,  $S_b$  and  $S_e$  (Figure S2).
5. Raman spectra of  $S_a$ ,  $S_b$  and  $S_e$  (Figure S3).
6. Deconvoluted C1s XPS spectra of different C-dots with peak area ( $A$ ) ratios of the  $sp^3$  C or oxidized C to the  $sp^2$  C (Table S3).
7. Deconvoluted N1s XPS spectra of different C-dots with  $A$  ratios of the pyrrolic N to pyridinic N (Table S4).

**Table S1:** The general co-reduction method with urea and thiourea to obtain C-dots.

| Serial <sup>a</sup> | Different carbon sources (mmol) | Urea (mmol) | Thiourea (mmol) | QY (%) |
|---------------------|---------------------------------|-------------|-----------------|--------|
| S1                  | Glucose (0.28)                  | 1.26        | 0.42            | 16     |
| S1U                 | Glucose (0.28)                  | 1.68        | 0               | 3      |
| S1T                 | Glucose (0.28)                  | 0           | 1.69            | 2      |
| S2                  | Xylose (0.28)                   | 1.26        | 0.42            | 14     |
| S2U                 | Xylose (0.28)                   | 1.68        | 0               | 1      |
| S2T                 | Xylose (0.28)                   | 0           | 1.69            | 2      |

<sup>a</sup> All the samples were dissolved in 30 mL of water.

**Table S2:** The scale-up synthesis of C-dots.

| Serial <sup>a</sup> | Sodium citrate (mmol) | Urea (mmol) | Thiourea (mmol) | Quantitative yield (g) | QY (%) |
|---------------------|-----------------------|-------------|-----------------|------------------------|--------|
| S <sub>a50</sub>    | 14.0                  | 84.0        | 0               | 3.08                   | 10     |
| S <sub>b50</sub>    | 14.0                  | 63.0        | 21.0            | 5.95                   | 25     |
| S <sub>e50</sub>    | 14.0                  | 0           | 84.0            | 4.85                   | 2      |

<sup>a</sup> All the samples were dissolved in 30 mL of water.

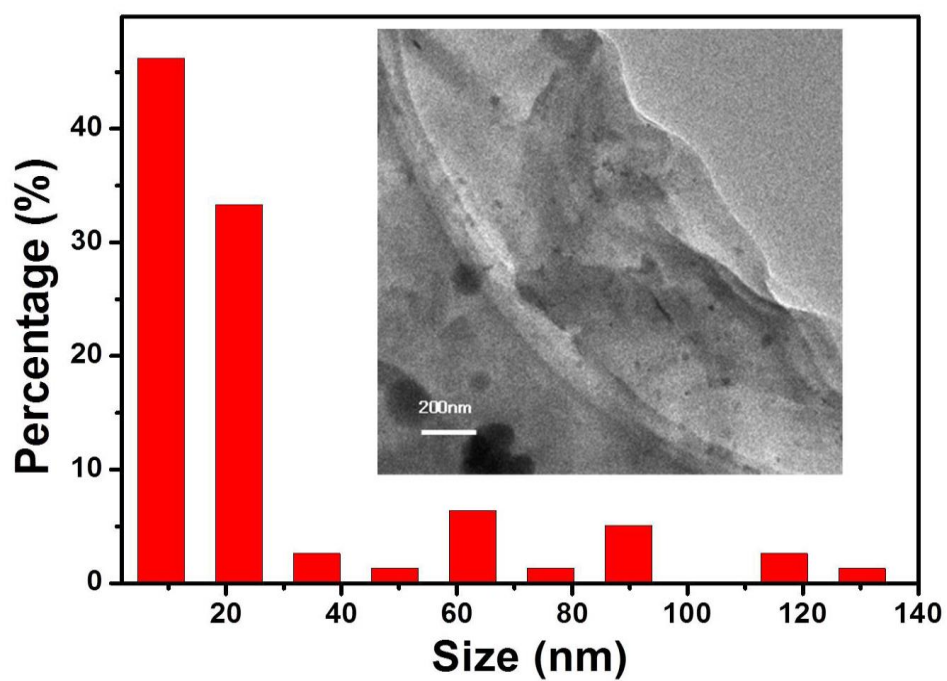

**Figure S1:** The TEM image (inset) and size distribution of S<sub>b50</sub>.

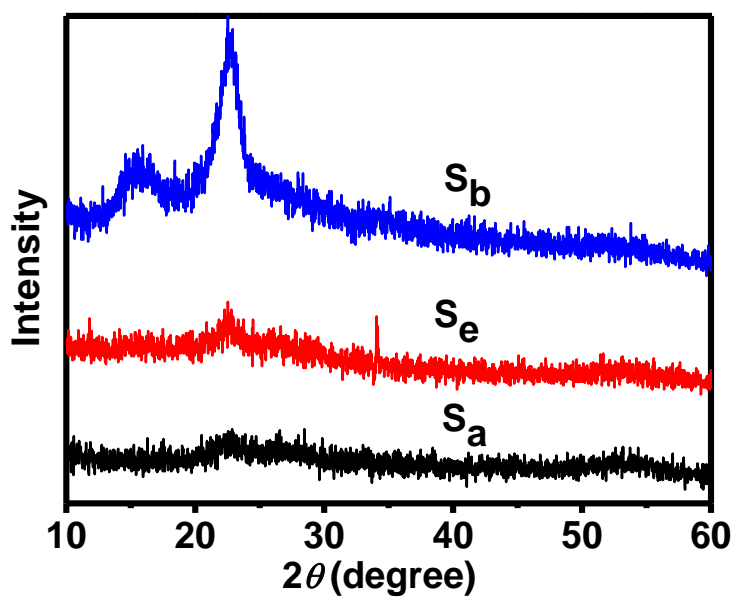

Figure S2: XRD patterns of S<sub>a</sub>, S<sub>b</sub> and S<sub>e</sub>.

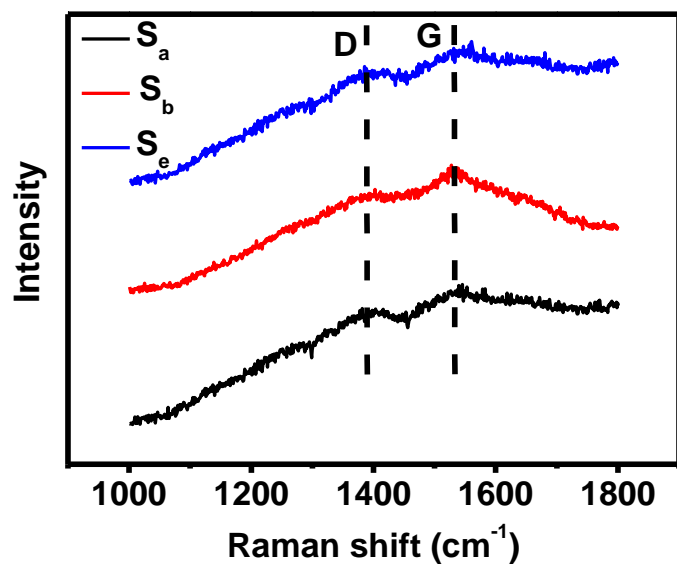

Figure S3: Raman spectra of S<sub>a</sub>, S<sub>b</sub> and S<sub>e</sub>.

**Table S3:** Detailed information of the deconvoluted C 1s XPS spectra of different C-dots with peak area (*A*) ratios of the sp<sup>3</sup> C or oxidized C to the sp<sup>2</sup> C.

| Sample         | Band                                            | sp <sup>2</sup> C | sp <sup>3</sup> C | Oxidized C |
|----------------|-------------------------------------------------|-------------------|-------------------|------------|
| S <sub>a</sub> | Position/eV                                     | 284.2             | 285.4             | 287.5      |
|                | Area                                            | 16934.0           | 5557.4            | 15158.3    |
|                | <i>A</i> / <i>A</i> <sub>sp<sup>2</sup> C</sub> | 1                 | 0.328             | 0.895      |
| S <sub>b</sub> | Position/eV                                     | 284.7             | 286.0             | 288.1      |
|                | Area                                            | 24323.5           | 14305.8           | 12436.8    |
|                | <i>A</i> / <i>A</i> <sub>sp<sup>2</sup> C</sub> | 1                 | 0.588             | 0.511      |
| S <sub>c</sub> | Position/eV                                     | 284.3             | 285.5             | 287.8      |
|                | Area                                            | 15281.0           | 11066.1           | 8056.7     |
|                | <i>A</i> / <i>A</i> <sub>sp<sup>2</sup> C</sub> | 1                 | 0.724             | 0.527      |

**Table S4:** Detailed information of the deconvoluted N 1s XPS spectra of different C-dots with peak area (*A*) ratios of the pyrrolic N to pyridinic N.

| Sample         | Band                                       | Pyrrolic N | Pyridinic N |
|----------------|--------------------------------------------|------------|-------------|
| S <sub>a</sub> | Position/eV                                | -          | 399.0       |
|                | Area                                       | -          | 7441.4      |
|                | <i>A</i> / <i>A</i> <sub>pyridinic N</sub> | 0          | 1           |
| S <sub>b</sub> | Position/eV                                | 399.8      | 398.0       |
|                | Area                                       | 9550.8     | 15273.3     |
|                | <i>A</i> / <i>A</i> <sub>pyridinic N</sub> | 0.625      | 1           |
| S <sub>c</sub> | Position/eV                                | 399.4      | 397.5       |
|                | Area                                       | 12495.6    | 9216.9      |
|                | <i>A</i> / <i>A</i> <sub>pyridinic N</sub> | 1.356      | 1           |
